# Supplementary material
Source: Royal Society of Chemistry journal article supplement (doi:10.1039/d6ta01907b)
Supplement: d6ta01907b1.pdf [file d6ta01907b1.pdf]

Supporting Information

Divergent A-Site Regulation Mechanisms in Rare-Earth and  
Alkaline-Earth Nickelates for Unlocking Bifunctional Oxygen  
Electrocatalysis

Taoda Liu<sup>1,2</sup>, Yuhang Dou<sup>1</sup>, Tian Ouyang<sup>2</sup>, Sheng Ma<sup>2</sup>, Zongqing Tian<sup>1</sup>, Zhiwei Peng<sup>1,3</sup>, Xiaoling He<sup>2</sup>, Wenyan Tao<sup>2\*</sup>, Yinghua Niu<sup>1\*</sup>, Weiqiang Lv<sup>1,3\*</sup>

1 School of Physics & School of Integrated Circuit Science and Engineering (Exemplary School of Microelectronics), University of Electronic Science and Technology of China, Chengdu 611731, P. R. China

2 School of Materials and New Energy, South China Normal University, Shanwei, 510006, P. R. China

3 Yangtze River Delta Research Institute (Huzhou), University of Electronic Science and Technology of China, Huzhou 313000, P. R. China

\*Corresponding authors:

Wenyan Tao: E-mail: taowenyan@m.scnu.edu.cn

Yinghua Niu: E-mail: yh\_niu@uestc.edu.cn

Weiqiang Lv: E-mail: eselwq@uestc.edu.cn

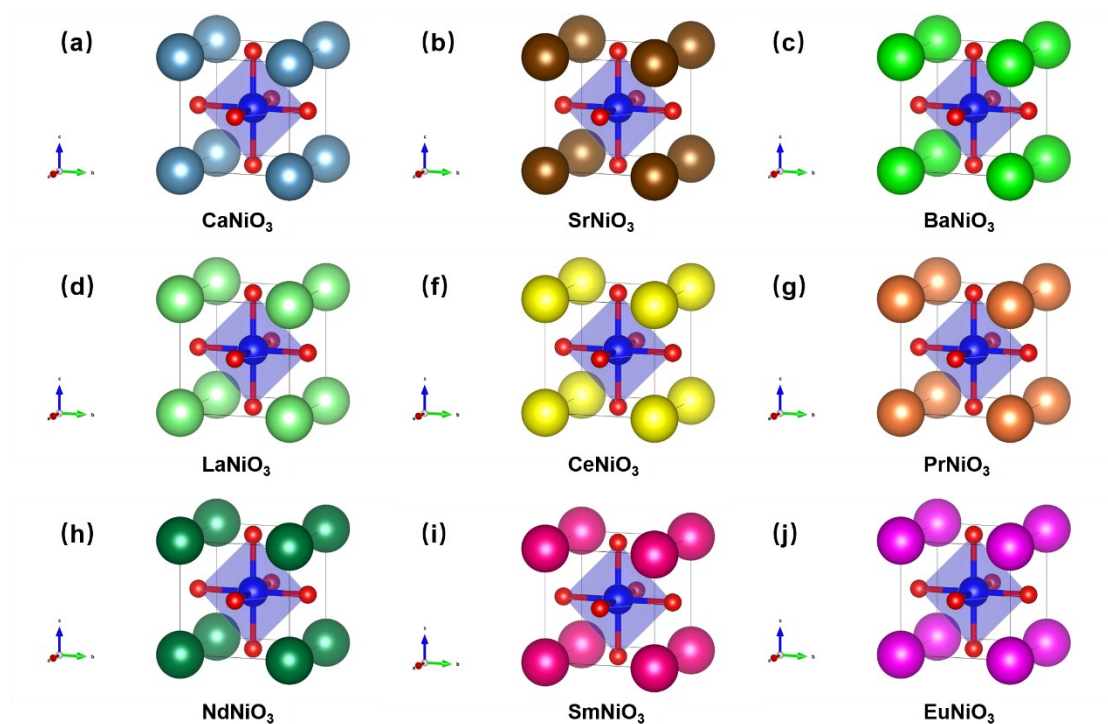

**Figure S1.** Bulk structure of  $ANiO_3$  perovskites: (a) $CaNiO_3$ , (b) $SrNiO_3$ , (c) $BaNiO_3$ , (d) $LaNiO_3$ , (e) $CeNiO_3$ , (f)  $PrNiO_3$ , (g)  $NdNiO_3$ , (h) $SmNiO_3$ , (i) $EuNiO_3$ ,. Ca, Sr, Ba, La, Ce, Pr, Nd, Sm, Eu, Ni, and O atoms are represented as light blue, brown, green, light green, yellow, orange, dark green, pink, purple, blue and red, respectively

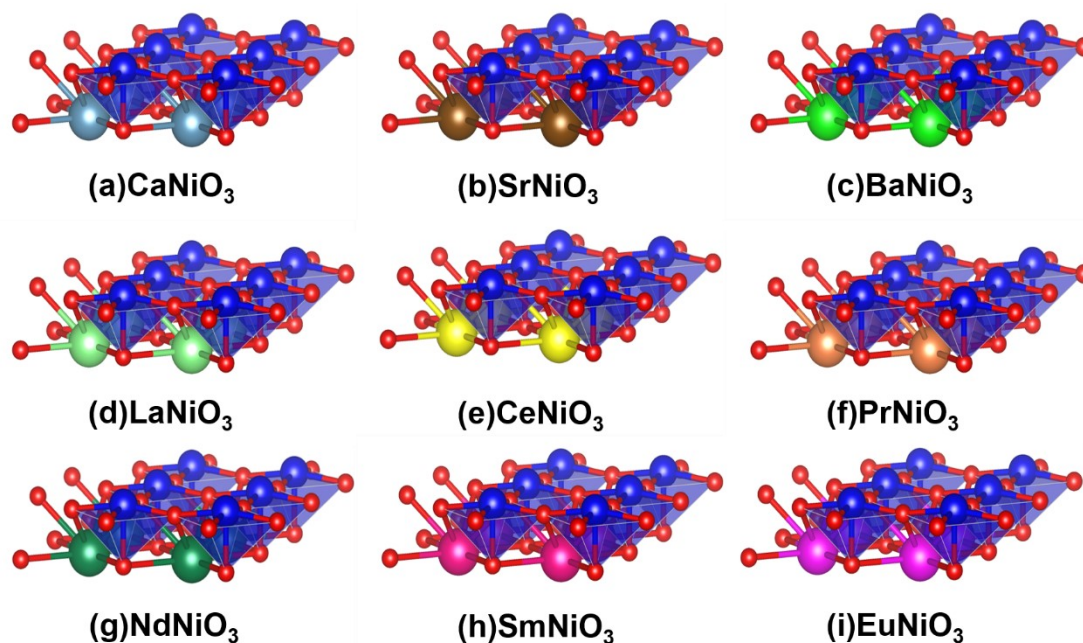

**Figure S2.** Optimization of surface structure of barium based perovskite (001) Ni-O: (a) $CaNiO_3$ , (b) $SrNiO_3$ , (c) $BaNiO_3$ , (d) $LaNiO_3$ , (e) $CeNiO_3$ , (f)  $PrNiO_3$ , (g)  $NdNiO_3$ , (h) $SmNiO_3$ , (i) $EuNiO_3$ ,. Ca, Sr, Ba, La, Ce, Pr, Nd, Sm, Eu, Ni, and O atoms

are presented as light blue, brown, green, light green, yellow, orange, dark green, pink, purple, blue and red, respectively

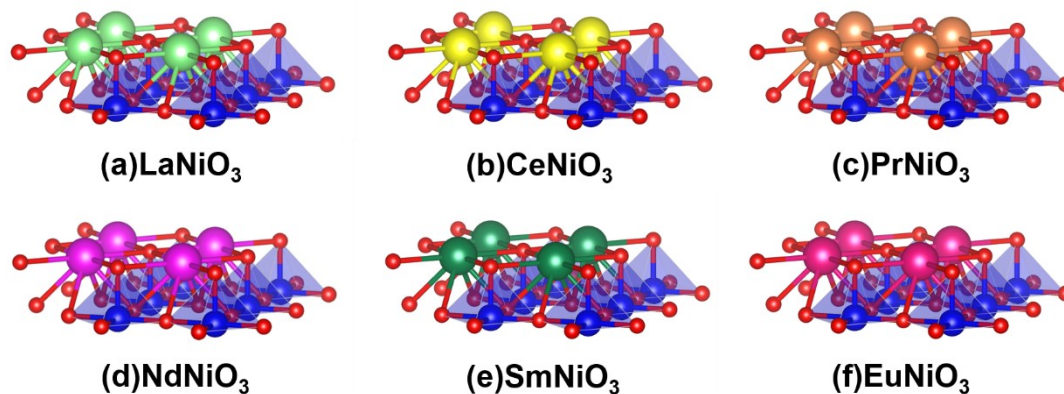

**Figure S3.** Optimization of surface structure of barium based perovskite (001) AO: (a)  $\text{LaNiO}_3$ , (b)  $\text{CeNiO}_3$ , (c)  $\text{PrNiO}_3$ , (d)  $\text{NdNiO}_3$ , (e)  $\text{SmNiO}_3$ , (f)  $\text{EuNiO}_3$ . La, Ce, Pr, Nd, Sm, Eu, Ni, and O atoms are represented as light green, yellow, orange, dark green, pink, purple, blue and red, respectively

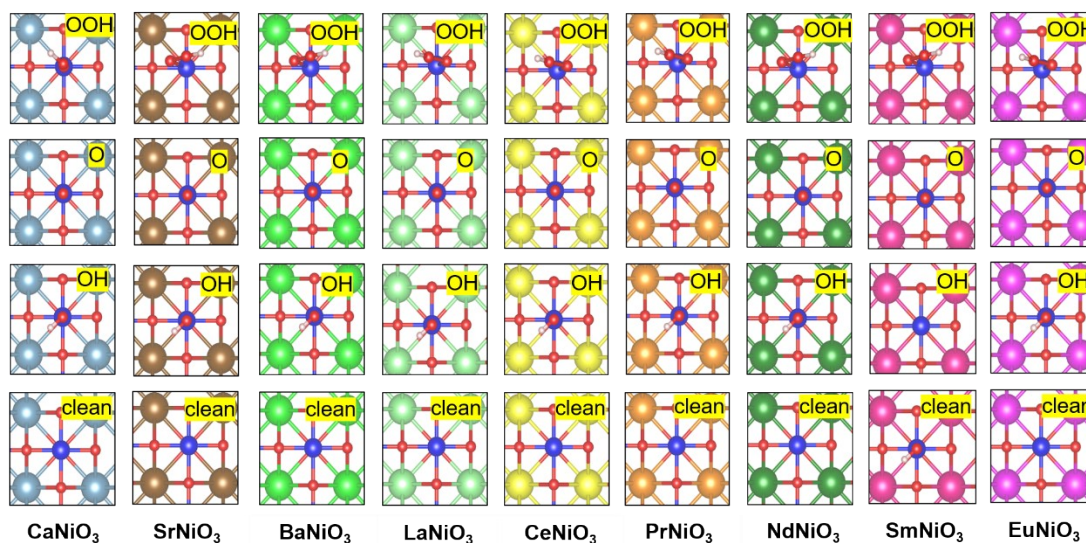

**Figure S4.** Adsorption models of intermediate species:  $^*\text{OOH}$ ,  $^*\text{O}$ , and  $^*\text{OH}$  of 001 Ni-O surface  $\text{ANiO}_3$  (A=Ca, Sr, Ba, La, Ce, Pr, Nd, Sm, Eu). Ca, Sr, Ba, La, Ce, Pr, Nd, Sm, Eu, Ni, and O atoms are represented as light blue, brown, green, light green, yellow, orange, dark green, pink, purple, blue and red, respectively

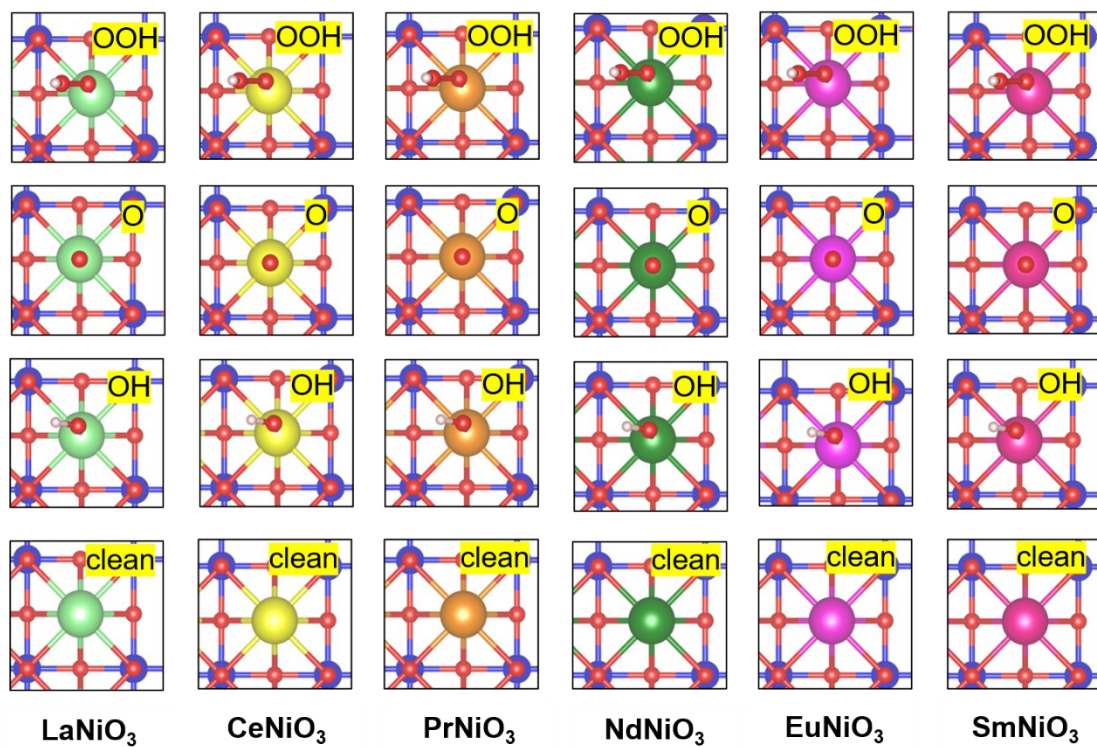

**Figure S5.** Adsorption models of intermediate species: \*OOH, \*O, and \*OH of 001 AO surface ANiO<sub>3</sub>(A=La, Ce, Pr, Nd, Sm, Eu). La, Ce, Pr, Nd, Sm, Eu, Ni, and O atoms represented as light green, yellow, orange, dark green, pink, purple, blue and red, respectively

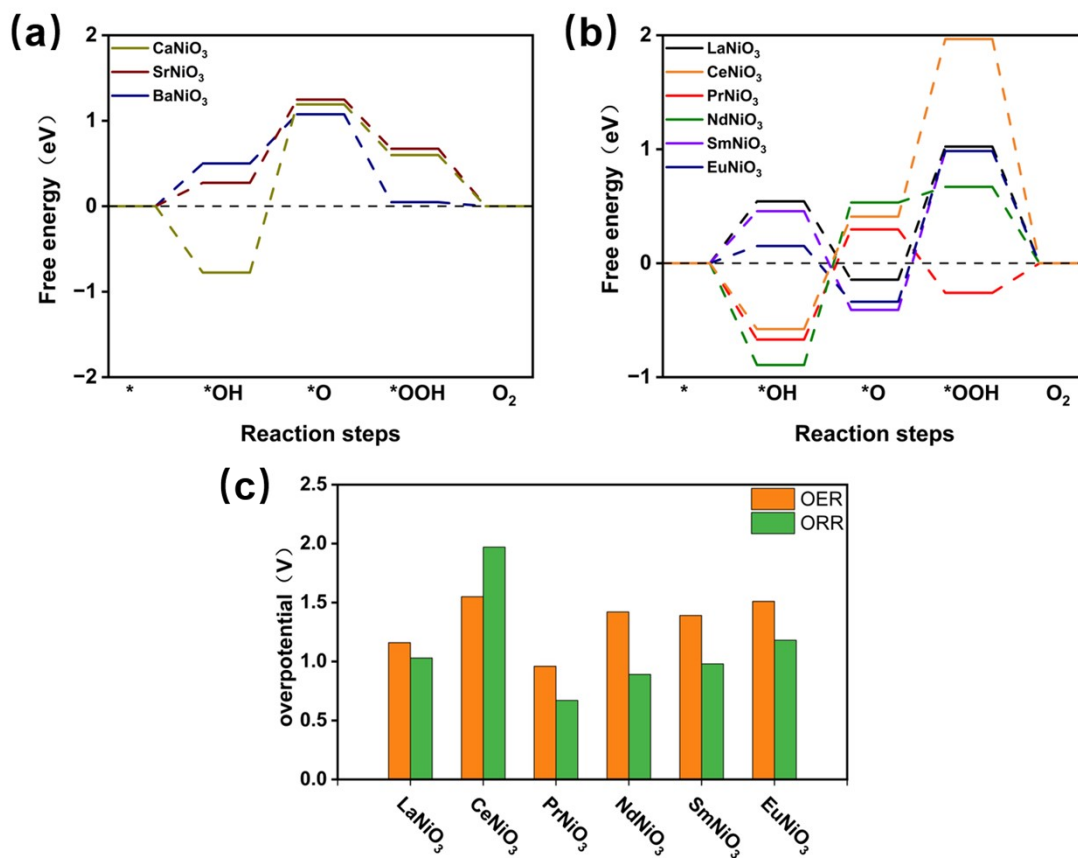

**Figure S6.** (a) Step diagram of alkaline earth free energy; (b) Rare earth AO surface free energy; (c) Comparison bar chart of overpotential on rare earth AO surface

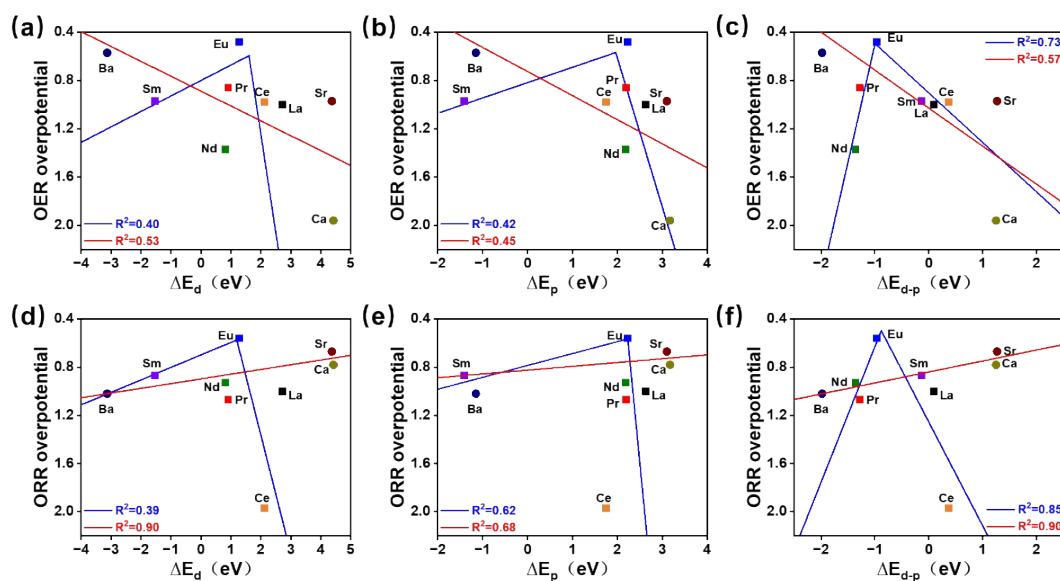

**Figure S7.** Structure performance relationship diagram of d-band ( $\Delta E_d$ ), p-band ( $\Delta E_p$ ), electron transfer energy ( $\Delta E_{d-p}$ ) with Ni-O surfaces OER and ORR overpotentials, respectively.

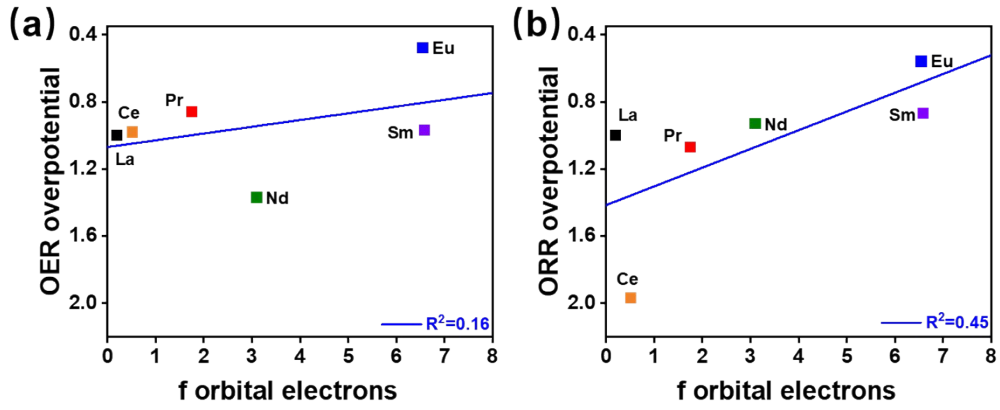

**Figure S8.** The relationship between the number of electrons in rare earth f-orbitals and the overpotentials of OER and ORR.

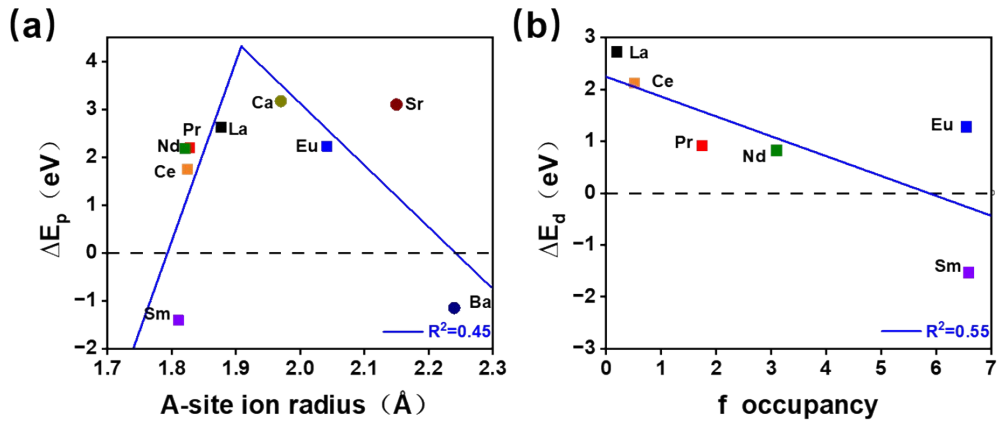

**Figure S9.**(a) Relationship diagram between A-site ion radius and p-band center ( $\Delta E_p$ ). (b) Relationship diagram between the number of electrons in rare earth f-orbitals and the center of the d-band ( $\Delta E_d$ ).

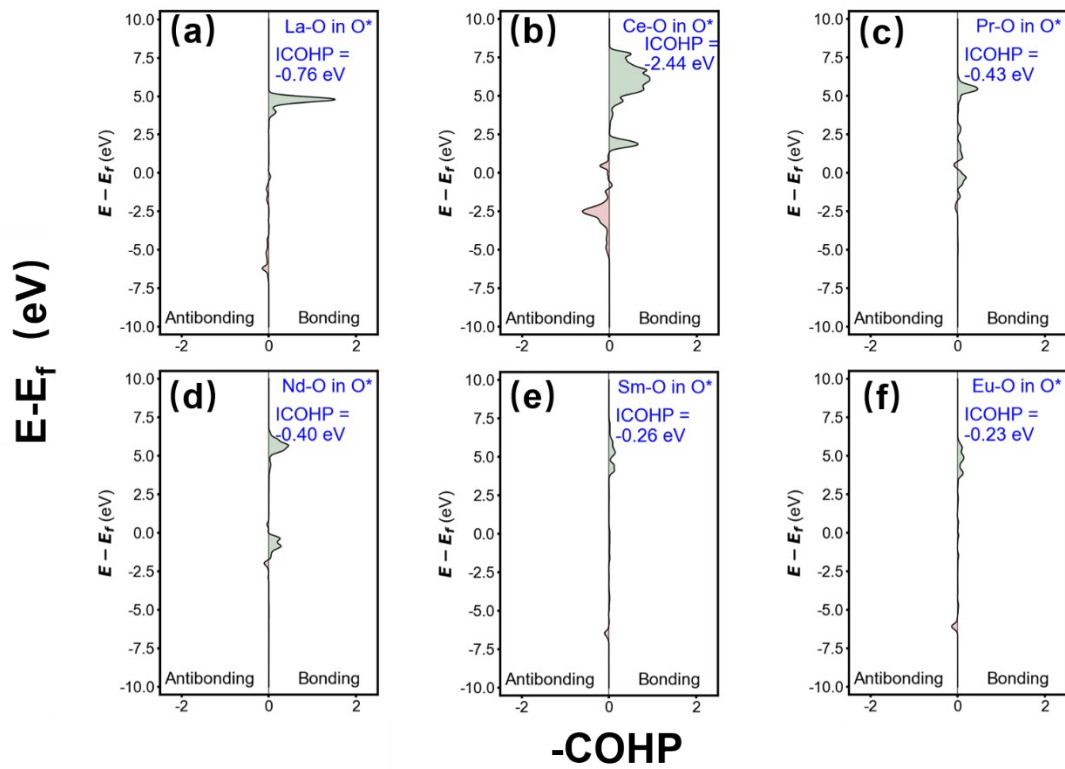

Figure S10. Cohp of A-O bond on AO surface of rare earth

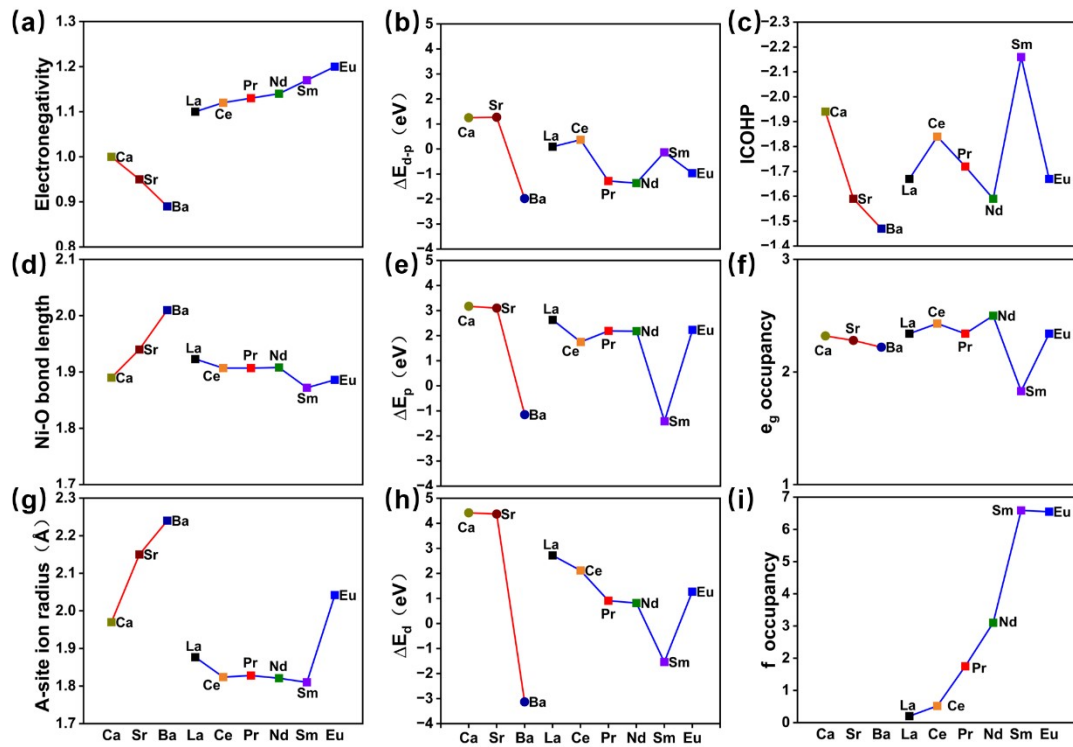

Figure S11. Overview of elemental properties and electronic structures of perovskites with different A-sites

**Table S1.** Detailed information on the Hubbard U values of each element in ANiO<sub>3</sub>.

| Elements | Pseudopotential | Valenceelectron                                 | HubbardU            |
|----------|-----------------|-------------------------------------------------|---------------------|
| Ni       | Ni              | 3d <sup>8</sup> 4s <sup>2</sup>                 | 6.2 <sup>[1]</sup>  |
| H        | H               | 1s <sup>1</sup>                                 | 0                   |
| O        | O               | 2s <sup>2</sup> 2p <sup>4</sup>                 | 0                   |
| Ca       | Ca_sv           | 3s <sup>2</sup> 3p <sup>6</sup> 4s <sup>2</sup> | 0                   |
| Sr       | Sr_sv           | 4s <sup>2</sup> 4p <sup>6</sup> 5s <sup>2</sup> | 0                   |
| Ba       | Ba_sv           | 5s <sup>2</sup> 5p <sup>6</sup> 6s <sup>2</sup> | 0                   |
| La       | La              | 4f <sup>0</sup> 5d <sup>1</sup> 6s <sup>2</sup> | 3.7 <sup>[2]</sup>  |
| Ce       | Ce              | 4f <sup>1</sup> 5d <sup>1</sup> 6s <sup>2</sup> | 5.0 <sup>[3]</sup>  |
| Pr       | Pr              | 4f <sup>3</sup> 6s <sup>2</sup>                 | 5.0 <sup>[4]</sup>  |
| Nd       | Nd              | 4f <sup>4</sup> 6s <sup>2</sup>                 | 4.8 <sup>[5]</sup>  |
| Sm       | Sm              | 4f <sup>6</sup> 6s <sup>2</sup>                 | 7.35 <sup>[6]</sup> |
| Eu       | Eu              | 4f <sup>7</sup> 6s <sup>2</sup>                 | 5.0 <sup>[7]</sup>  |

**Table S2.** The optimized bulk structure of E<sub>f</sub> in each case.

| Bulk               | E <sub>f</sub> (eV/atom) | Space group | Lattice parameter (Å)                   |
|--------------------|--------------------------|-------------|-----------------------------------------|
| CaNiO <sub>3</sub> | -4.51                    | PM-3M (221) | a=b=c=3.78                              |
| SrNiO <sub>3</sub> | -4.76                    | PM-3M (221) | a=b=c=3.88                              |
| BaNiO <sub>3</sub> | -4.93                    | PM-3M (221) | a=b=c=4.03                              |
| LaNiO <sub>3</sub> | -8.35                    | PM-3M (221) | a=b=c=3.84<br>a=b=c=3.84 <sup>[8]</sup> |
| CeNiO <sub>3</sub> | -6.49                    | PM-3M (221) | a=b=c=3.81                              |
| PrNiO <sub>3</sub> | -6.71                    | PM-3M (221) | a=b=c=3.81                              |
| NdNiO <sub>3</sub> | -7.95                    | PM-3M (221) | a=b=c=3.81                              |
| SmNiO <sub>3</sub> | -7.99                    | PM-3M (221) | a=b=c=3.77                              |
| EuNiO <sub>3</sub> | -7.61                    | PM-3M (221) | a=b=c=3.77                              |

**Table S3.** The A parameter of ANiO<sub>3</sub> perovskite includes ion radius, Ni-O bond length, and electronegativity.

| Bulk               | A-site ion radius (Å) | Ni-O Bond length | Electronegativity |
|--------------------|-----------------------|------------------|-------------------|
| CaNiO <sub>3</sub> | 1.970                 | 1.890            | 1.00              |
| SrNiO <sub>3</sub> | 2.150                 | 1.940            | 0.95              |
| BaNiO <sub>3</sub> | 2.240                 | 2.010            | 0.89              |
| LaNiO <sub>3</sub> | 1.877                 | 1.923            | 1.10              |
| CeNiO <sub>3</sub> | 1.824                 | 1.907            | 1.12              |
| PrNiO <sub>3</sub> | 1.828                 | 1.907            | 1.13              |
| NdNiO <sub>3</sub> | 1.821                 | 1.908            | 1.14              |
| SmNiO <sub>3</sub> | 1.810                 | 1.872            | 1.17              |
| EuNiO <sub>3</sub> | 2.042                 | 1.886            | 1.20              |

**Table S4.** Calculated results of surface energy and adsorption energy (eV) of the intermediates: \*OOH, \*O, and \*OH on ANiO<sub>3</sub>α(001) Ni-O surfaces.

| Surface-BO (001)   | surface energy (J/m <sup>2</sup> ) | *OH Adsorption Energy (eV) | *O Adsorption energy (eV) | *OOH Adsorption energy (eV) |
|--------------------|------------------------------------|----------------------------|---------------------------|-----------------------------|
| CaNiO <sub>3</sub> | 1.21                               | -3.33                      | -2.16                     | -2.84                       |
| SrNiO <sub>3</sub> | 1.08                               | -2.34                      | -2.17                     | -2.75                       |
| BaNiO <sub>3</sub> | 0.79                               | -2.10                      | -2.32                     | -3.36                       |
| LaNiO <sub>3</sub> | 1.12                               | -2.04                      | -1.87                     | -2.44                       |
| CeNiO <sub>3</sub> | 1.01                               | -2.01                      | -1.81                     | -3.86                       |
| PrNiO <sub>3</sub> | 1.41                               | -1.97                      | -1.94                     | -2.36                       |
| NdNiO <sub>3</sub> | 1.24                               | -2.78                      | -2.21                     | -3.19                       |
| SmNiO <sub>3</sub> | 1.41                               | -2.18                      | -2.01                     | -2.54                       |
| EuNiO <sub>3</sub> | 1.99                               | -2.10                      | -2.11                     | -2.90                       |

**Table S5.** Calculated results of surface energy and adsorption energy (eV) of the intermediates: \*OOH, \*O, and \*OH on ANiO<sub>3</sub>-(001) AO (La-Eu) surfaces.

| Surface-AO (001)   | surface energy (J/m <sup>2</sup> ) | *OH Adsorption Energy (eV) | *O Adsorption energy (eV) | *OOH Adsorption energy (eV) |
|--------------------|------------------------------------|----------------------------|---------------------------|-----------------------------|
| LaNiO <sub>3</sub> | 0.23                               | -1.93                      | -3.58                     | -2.34                       |
| CeNiO <sub>3</sub> | 0.14                               | -3.18                      | -3.03                     | -1.46                       |
| PrNiO <sub>3</sub> | 0.13                               | -3.15                      | -3.07                     | -3.62                       |
| NdNiO <sub>3</sub> | 0.14                               | -3.39                      | -2.83                     | -2.72                       |
| SmNiO <sub>3</sub> | 0.01                               | -2.05                      | -3.82                     | -2.38                       |
| EuNiO <sub>3</sub> | 1.51                               | -2.40                      | -3.74                     | -2.24                       |

**Table S6.** Summarized  $\Delta G$ , ZPE – T $\Delta S$ , PDS, VL, max( $\Delta G$ ) and  $\eta_{\text{OER}}$  for OER on all Ni-O surfaces.

|   |                    | $\Delta G(*\text{OH})$ (eV) | $\Delta G(*\text{O})$ (eV) | $\Delta G(*\text{OOH})$ (eV) | (ZPE – T $\Delta S$ ) (*OH) (eV) | (ZPE – T $\Delta S$ ) (*O) (eV) | (ZPE – T $\Delta S$ ) (*OOH) (eV) | OER PDS | OER V <sub>L</sub> (eV) | max( $\Delta G$ ) (eV) | $\eta_{\text{OER}}$ (V) |
|---|--------------------|-----------------------------|----------------------------|------------------------------|----------------------------------|---------------------------------|-----------------------------------|---------|-------------------------|------------------------|-------------------------|
| 1 | CaNiO <sub>3</sub> | 0.45                        | 3.19                       | 0.64                         | 0.26                             | -0.03                           | 0.33                              | *OH→*O  | 3.19                    | 3.19                   | 1.96                    |
| 2 | SrNiO <sub>3</sub> | 1.50                        | 2.20                       | 0.65                         | 0.32                             | 0.02                            | 0.31                              | *OH→*O  | 2.20                    | 2.20                   | 0.97                    |
| 3 | BaNiO <sub>3</sub> | 1.73                        | 1.80                       | 0.20                         | 0.31                             | 0.01                            | 0.30                              | *OH→*O  | 1.80                    | 1.80                   | 0.57                    |
| 4 | LaNiO <sub>3</sub> | 1.74                        | 2.23                       | 0.70                         | 0.27                             | -0.00                           | 0.33                              | *OH→*O  | 2.23                    | 2.23                   | 1.00                    |
| 5 | CeNiO <sub>3</sub> | 1.82                        | 2.21                       | -0.74                        | 0.31                             | 0.00                            | 0.35                              | *OH→*O  | 2.21                    | 2.21                   | 0.98                    |
| 6 | PrNiO <sub>3</sub> | 1.90                        | 2.09                       | 0.85                         | 0.25                             | 0.00                            | 0.32                              | *OH→*O  | 2.09                    | 2.09                   | 0.86                    |
| 7 | NdNiO <sub>3</sub> | 1.03                        | 2.60                       | 0.29                         | 0.29                             | 0.00                            | 0.31                              | *OH→*O  | 2.60                    | 2.60                   | 1.37                    |
| 8 | SmNiO <sub>3</sub> | 1.63                        | 2.20                       | 0.73                         | 0.29                             | 0.00                            | 0.31                              | *OH→*O  | 2.20                    | 2.20                   | 0.97                    |
| 9 | EuNiO <sub>3</sub> | 1.68                        | 1.71                       | 0.85                         | 0.27                             | -0.01                           | 0.35                              | *OH→*O  | 1.71                    | 1.71                   | 0.48                    |

**Table S7.** Summarized  $\Delta G$ , ZPE – T $\Delta$ S, PDS, VL, max( $\Delta G$ ) and  $\eta$ ORR for ORR on all Ni-O surfaces.

|   |                    | $\Delta G(*OOH)$<br>(eV) | $\Delta G(*O)$<br>(eV) | $\Delta G(*OH)$<br>(eV) | (ZPE – T $\Delta$ S)<br>(*OOH)<br>(eV) | (ZPE – T $\Delta$ S)<br>(*O) (eV) | (ZPE – T $\Delta$ S)<br>(*OH)<br>(eV) | ORR PDS               | ORR<br>V <sub>L</sub><br>(eV) | max( $\Delta G$ )<br>(eV) | $\eta$ ORR<br>(V) |
|---|--------------------|--------------------------|------------------------|-------------------------|----------------------------------------|-----------------------------------|---------------------------------------|-----------------------|-------------------------------|---------------------------|-------------------|
| 1 | CaNiO <sub>3</sub> | -0.63                    | -0.63                  | -3.19                   | 0.33                                   | -0.03                             | 0.26                                  | *OH→*H <sub>2</sub> O | 0.45                          | -0.45                     | 0.78              |
| 2 | SrNiO <sub>3</sub> | -0.56                    | -0.65                  | -2.20                   | 0.31                                   | 0.02                              | 0.32                                  | O <sub>2</sub> →*OOH  | 0.56                          | -0.56                     | 0.67              |
| 3 | BaNiO <sub>3</sub> | -1.18                    | -0.21                  | -1.80                   | 0.31                                   | 0.00                              | 0.29                                  | *OOH→*O               | 0.21                          | -0.21                     | 1.02              |
| 4 | LaNiO <sub>3</sub> | -0.23                    | -0.70                  | -2.23                   | 0.33                                   | -0.00                             | 0.27                                  | O <sub>2</sub> →*OOH  | 0.23                          | -0.23                     | 1.00              |
| 5 | CeNiO <sub>3</sub> | -1.62                    | 0.74                   | -2.21                   | 0.35                                   | 0.00                              | 0.31                                  | O <sub>2</sub> →*OOH  | -0.74                         | 0.74                      | 1.97              |
| 6 | PrNiO <sub>3</sub> | -0.16                    | -0.85                  | -2.09                   | 0.32                                   | 0.00                              | 0.25                                  | O <sub>2</sub> →*OOH  | 0.16                          | -0.16                     | 1.07              |
| 7 | NdNiO <sub>3</sub> | -0.98                    | -0.29                  | -2.60                   | 0.31                                   | 0.00                              | 0.29                                  | *OOH→*O               | 0.29                          | -0.29                     | 0.93              |
| 8 | SmNiO <sub>3</sub> | -0.35                    | -0.73                  | -2.20                   | 0.31                                   | 0.00                              | 0.29                                  | O <sub>2</sub> →*OOH  | 0.35                          | -0.35                     | 0.87              |
| 9 | EuNiO <sub>3</sub> | -0.66                    | -0.85                  | -1.71                   | 0.35                                   | -0.01                             | 0.27                                  | O <sub>2</sub> →*OOH  | 0.66                          | -0.66                     | 0.56              |

**Table S8.** Summarized  $\Delta G$ , ZPE – T $\Delta$ S, PDS, VL, max( $\Delta G$ ) and  $\eta$ OER for OER on AO(La-Eu) surfaces.

|   |                    | $\Delta G(*OH)$<br>(eV) | $\Delta G(*O)$<br>(eV) | $\Delta G(*OOH)$<br>(eV) | (ZPE – T $\Delta$ S)<br>(*OH)<br>(eV) | (ZPE – T $\Delta$ S)<br>(*O) (eV) | (ZPE – T $\Delta$ S)<br>(*OOH)<br>(eV) | OER PDS | OER<br>V <sub>L</sub><br>(eV) | max( $\Delta G$ )<br>(eV) | $\eta$ OER<br>(V) |
|---|--------------------|-------------------------|------------------------|--------------------------|---------------------------------------|-----------------------------------|----------------------------------------|---------|-------------------------------|---------------------------|-------------------|
| 1 | LaNiO <sub>3</sub> | 1.63                    | 0.82                   | 2.39                     | 0.18                                  | -0.04                             | 0.26                                   | *OH→*O  | 2.39                          | 2.39                      | 1.16              |
| 2 | CeNiO <sub>3</sub> | 0.65                    | 2.21                   | 2.78                     | 0.31                                  | 0.04                              | 0.32                                   | *OH→*O  | 2.78                          | 2.78                      | 1.55              |
| 3 | PrNiO <sub>3</sub> | 0.55                    | 2.19                   | 0.67                     | 0.18                                  | -0.02                             | 0.25                                   | *OH→*O  | 2.19                          | 2.19                      | 0.96              |
| 4 | NdNiO <sub>3</sub> | 0.33                    | 2.65                   | 1.36                     | 0.21                                  | -0.02                             | 0.28                                   | *OH→*O  | 2.65                          | 2.65                      | 1.42              |
| 5 | SmNiO <sub>3</sub> | 1.68                    | 0.36                   | 2.62                     | 0.22                                  | 0.02                              | 0.25                                   | *O→*OOH | 2.62                          | 2.62                      | 1.39              |
| 6 | EuNiO <sub>3</sub> | 1.38                    | 0.74                   | 2.74                     | 0.26                                  | 0.01                              | 0.30                                   | *O→*OOH | 2.74                          | 2.74                      | 1.51              |

**Table S9.** Summarized  $\Delta G$ , ZPE – T $\Delta$ S, PDS, VL, max( $\Delta G$ ) and  $\eta$ ORR for ORR on AO(La-Eu) surfaces.

|   |                    | $\Delta G(*OOH)$<br>(eV) | $\Delta G(*O)$<br>(eV) | $\Delta G(*OH)$<br>(eV) | (ZPE – T $\Delta$ S)<br>(*OOH)<br>(eV) | (ZPE – T $\Delta$ S)<br>(*O) (eV) | (ZPE – T $\Delta$ S)<br>(*OH)<br>(eV) | ORR PDS              | ORR<br>V <sub>L</sub><br>(eV) | max( $\Delta G$ )<br>(eV) | $\eta$ ORR<br>(V) |
|---|--------------------|--------------------------|------------------------|-------------------------|----------------------------------------|-----------------------------------|---------------------------------------|----------------------|-------------------------------|---------------------------|-------------------|
| 1 | LaNiO <sub>3</sub> | -0.20                    | -2.39                  | -0.54                   | 0.26                                   | -0.04                             | 0.18                                  | O <sub>2</sub> →*OOH | 0.20                          | -0.20                     | 1.03              |
| 2 | CeNiO <sub>3</sub> | 0.73                     | -2.78                  | -2.21                   | 0.32                                   | 0.04                              | 0.31                                  | O <sub>2</sub> →*OOH | -0.73                         | 0.73                      | 1.97              |
| 3 | PrNiO <sub>3</sub> | -1.48                    | -0.67                  | -2.19                   | 0.25                                   | -0.02                             | 0.18                                  | O <sub>2</sub> →*OOH | 0.56                          | -0.56                     | 0.67              |
| 4 | NdNiO <sub>3</sub> | -0.56                    | -1.36                  | -2.65                   | 0.28                                   | -0.02                             | 0.21                                  | *OOH→*O              | 0.33                          | -0.33                     | 0.89              |
| 5 | SmNiO <sub>3</sub> | -0.24                    | -2.62                  | -0.36                   | 0.25                                   | 0.02                              | 0.22                                  | O <sub>2</sub> →*OOH | 0.24                          | -0.24                     | 0.98              |
| 6 | EuNiO <sub>3</sub> | -0.05                    | -2.74                  | -0.74                   | 0.30                                   | 0.01                              | 0.26                                  | O <sub>2</sub> →*OOH | 0.05                          | -0.05                     | 1.18              |

**Table S10.** Comparison of band gap data for ANiO<sub>3</sub> perovskite.

| Bulk               | Theoretical bandgap calculation | Material project bandgap | Experimental          |
|--------------------|---------------------------------|--------------------------|-----------------------|
| CaNiO <sub>3</sub> | 0.00eV                          | /                        | /                     |
| SrNiO <sub>3</sub> | 0.00eV                          | 0.00eV                   | /                     |
| BaNiO <sub>3</sub> | 0.00eV                          | 0.00eV                   | /                     |
| LaNiO <sub>3</sub> | 0.00eV                          | 0.00eV                   | 0.00eV <sup>[9]</sup> |
| CeNiO <sub>3</sub> | 0.00eV                          | 0.00eV                   | /                     |
| PrNiO <sub>3</sub> | 0.00eV                          | /                        | /                     |
| NdNiO <sub>3</sub> | 0.00eV                          | /                        | /                     |
| SmNiO <sub>3</sub> | 0.00eV                          | 0.00eV                   | /                     |
| EuNiO <sub>3</sub> | 0.00eV                          | 0.00eV                   | /                     |

**Table S11.** Electronic structure descriptors of ANiO<sub>3</sub> perovskite (d-band center, p-band center, electron transfer energy ( $\Delta E_{d-p}$ ),  $e_g$  orbital occupancy and f orbital electrons)

| Bulk               | d-band center | p-band center | $e_g$ orbital occupancy | Electron transfer energy ( $\Delta E_{d-p}$ ) | f orbital electrons |
|--------------------|---------------|---------------|-------------------------|-----------------------------------------------|---------------------|
| CaNiO <sub>3</sub> | 4.42          | 3.17          | 2.34                    | 1.25                                          | /                   |
| SrNiO <sub>3</sub> | 4.37          | 3.10          | 2.43                    | 1.27                                          | /                   |
| BaNiO <sub>3</sub> | -3.13         | -1.15         | 2.34                    | -1.98                                         | /                   |
| LaNiO <sub>3</sub> | 2.72          | 2.63          | 2.34                    | 0.09                                          | 0.20                |
| CeNiO <sub>3</sub> | 2.12          | 1.75          | 2.43                    | 0.37                                          | 0.52                |
| PrNiO <sub>3</sub> | 0.91          | 2.19          | 2.34                    | -1.28                                         | 1.75                |
| NdNiO <sub>3</sub> | 0.82          | 2.18          | 2.50                    | -1.36                                         | 3.10                |
| SmNiO <sub>3</sub> | -1.54         | -1.41         | 1.83                    | -0.13                                         | 6.59                |
| EuNiO <sub>3</sub> | 1.27          | 2.23          | 2.34                    | -0.96                                         | 6.55                |

**Table S12.** Bader charge analysis (in |e|) of Ni-active site on ANiO<sub>3</sub> perovskite oxides during ORR and OER.

| Number | Catalysts          | $\Delta\delta_B$<br>(clean) | $\Delta\delta_B$<br>(*OH) | $\Delta\delta_B$<br>(*O) | $\Delta\delta_B$<br>(*OOH) | $\Delta\delta_{\text{surface}}$<br>(*OH) | $\Delta\delta_{\text{OH}}$<br>(*OH) | $\Delta\delta_{\text{surface}}$<br>(*O) | $\Delta\delta_{\text{*O}}$<br>(*O) | $\Delta\delta_{\text{surface}}$<br>(*OOH) | $\Delta\delta_{\text{*OOH}}$<br>(*OOH) |
|--------|--------------------|-----------------------------|---------------------------|--------------------------|----------------------------|------------------------------------------|-------------------------------------|-----------------------------------------|------------------------------------|-------------------------------------------|----------------------------------------|
| 1      | CaNiO <sub>3</sub> | +1.38                       | +1.13                     | +1.38                    | +0.83                      | +0.68                                    | -0.68                               | +0.36                                   | -0.36                              | +0.27                                     | -0.27                                  |
| 2      | SrNiO <sub>3</sub> | +1.35                       | +1.08                     | +1.39                    | +1.04                      | +0.66                                    | -0.66                               | +0.34                                   | +0.34                              | +0.21                                     | -0.21                                  |
| 3      | BaNiO <sub>3</sub> | +1.29                       | +1.32                     | +1.38                    | +1.25                      | +0.77                                    | -0.77                               | +0.31                                   | -0.31                              | +0.30                                     | -0.30                                  |
| 4      | LaNiO <sub>3</sub> | +1.30                       | +1.40                     | +1.41                    | +1.36                      | +0.84                                    | -0.84                               | +0.38                                   | -0.38                              | +0.30                                     | -0.30                                  |
| 5      | CeNiO <sub>3</sub> | +1.23                       | +1.10                     | +1.21                    | +0.92                      | +0.84                                    | -0.84                               | +0.21                                   | -0.21                              | +0.13                                     | -0.13                                  |
| 6      | PrNiO <sub>3</sub> | +1.32                       | +1.04                     | +1.43                    | +1.37                      | +0.80                                    | -0.80                               | +0.37                                   | -0.37                              | +0.36                                     | -0.36                                  |
| 7      | NdNiO <sub>3</sub> | +1.34                       | +1.35                     | +1.32                    | +1.17                      | +0.90                                    | -0.90                               | +0.31                                   | -0.31                              | +0.35                                     | -0.35                                  |
| 8      | SmNiO <sub>3</sub> | +1.26                       | +1.30                     | +1.32                    | +1.29                      | +0.88                                    | -0.88                               | +0.34                                   | -0.34                              | +0.30                                     | -0.30                                  |
| 9      | EuNiO <sub>3</sub> | +1.43                       | +1.23                     | +1.31                    | +1.13                      | +0.87                                    | -0.87                               | +0.33                                   | -0.33                              | +0.26                                     | -0.26                                  |

**Table S13.** Bader charge analysis (in |e|) of B atoms on ANiO<sub>3</sub> perovskite oxides.

| Catalysts          | $\Delta\delta_{\text{avg}}$ (B-site) | $\Delta\delta_{\text{avg}}$ (O-site) |
|--------------------|--------------------------------------|--------------------------------------|
| CaNiO <sub>3</sub> | +1.38                                | -0.96                                |
| SrNiO <sub>3</sub> | +1.35                                | -0.97                                |
| BaNiO <sub>3</sub> | +1.29                                | -0.94                                |
| LaNiO <sub>3</sub> | +1.30                                | -1.09                                |
| CeNiO <sub>3</sub> | +1.23                                | -1.10                                |
| PrNiO <sub>3</sub> | +1.32                                | -1.11                                |
| NdNiO <sub>3</sub> | +1.34                                | -1.11                                |
| SmNiO <sub>3</sub> | +1.26                                | -1.08                                |
| EuNiO <sub>3</sub> | +1.43                                | -0.95                                |

**Table S14.** Element properties - electronic structure descriptor correspondence table

| Catalysts          | Element properties |                   | Electronic structure descriptor |              |                  |       |
|--------------------|--------------------|-------------------|---------------------------------|--------------|------------------|-------|
|                    | A-site ion radius  | electronegativity | $\Delta E_d$                    | $\Delta E_p$ | $\Delta E_{d-p}$ | $e_g$ |
| CaNiO <sub>3</sub> | 1.970              | 1.00              | 4.42                            | 3.17         | 1.25             | 2.34  |
| SrNiO <sub>3</sub> | 2.150              | 0.95              | 4.37                            | 3.10         | 1.27             | 2.43  |
| BaNiO <sub>3</sub> | 2.240              | 0.89              | -3.13                           | -1.15        | -1.98            | 2.34  |
| LaNiO <sub>3</sub> | 1.877              | 1.10              | 2.72                            | 2.63         | 0.09             | 2.34  |
| CeNiO <sub>3</sub> | 1.824              | 1.12              | 2.12                            | 1.75         | 0.37             | 2.43  |
| PrNiO <sub>3</sub> | 1.828              | 1.13              | 0.91                            | 2.19         | -1.28            | 2.34  |
| NdNiO <sub>3</sub> | 1.821              | 1.14              | 0.82                            | 2.18         | -1.36            | 2.50  |
| SmNiO <sub>3</sub> | 1.810              | 1.17              | -1.54                           | -1.41        | -0.13            | 1.83  |
| EuNiO <sub>3</sub> | 2.042              | 1.20              | 1.27                            | 2.23         | -0.96            | 2.34  |

**Table S15** Summarized ICOHP values of Ni–O and A–O/Ni–O bonds for all ANiO<sub>3</sub> perovskites

| Catalysts          | ICOHP of Ni–O (BO-terminated) / eV | ICOHP of A–O (AO-terminated) / eV |
|--------------------|------------------------------------|-----------------------------------|
| CaNiO <sub>3</sub> | -1.94                              | /                                 |
| SrNiO <sub>3</sub> | -1.59                              | /                                 |
| BaNiO <sub>3</sub> | -1.47                              | /                                 |
| LaNiO <sub>3</sub> | -1.67                              | -0.76                             |
| CeNiO <sub>3</sub> | -1.84                              | -2.44                             |
| PrNiO <sub>3</sub> | -1.72                              | -0.43                             |
| NdNiO <sub>3</sub> | -1.59                              | -0.40                             |
| SmNiO <sub>3</sub> | -2.16                              | -0.26                             |
| EuNiO <sub>3</sub> | -1.67                              | -0.23                             |

**Table S16** Radar chart data sheet

|                     | Rare earth<br>OER<br>overpotential | Rare earth<br>ORR<br>overpotential | Alkaline earth<br>OER<br>overpotential | Alkaline earth<br>ORR<br>overpotential |
|---------------------|------------------------------------|------------------------------------|----------------------------------------|----------------------------------------|
| d-band center       | 0.40                               | 0.39                               | 0.53                                   | 0.90                                   |
| p-band center       | 0.42                               | 0.62                               | 0.45                                   | 0.68                                   |
| ICOHP               | 0.48                               | 0.85                               | 0.74                                   | 0.20                                   |
| $e_g$               | 0.71                               | 0.84                               | 0.87                                   | 0.56                                   |
| $\Delta E_{d-p}$    | 0.85                               | 0.73                               | 0.90                                   | 0.57                                   |
| electronegativity   | 0.31                               | 0.36                               | 0.91                                   | 0.50                                   |
| A-site ion radius   | 0.61                               | 0.27                               | 0.99                                   | 0.26                                   |
| Ni-O Bond length    | 0.59                               | 0.38                               | 0.89                                   | 0.54                                   |
| F orbital electrons | 0.13                               | 0.45                               | /                                      | /                                      |

**Table S17** Normalized tabular data for optimal descriptor of radar graph

$$new\_value = (value - min)/(max - min)$$

|                    | d-band center | $e_g$ | $\Delta E_{d-p}$ | A-site ion radius |
|--------------------|---------------|-------|------------------|-------------------|
| CaNiO <sub>3</sub> | 1.00          | 1.00  | 0.99             | 0.00              |
| SrNiO <sub>3</sub> | 0.99          | 0.60  | 1.00             | 0.67              |
| BaNiO <sub>3</sub> | 0.00          | 0.00  | 0.00             | 1.00              |

|                    | ICOHP | $e_g$ | $\Delta E_{d-p}$ | A-site ion radius |
|--------------------|-------|-------|------------------|-------------------|
| LaNiO <sub>3</sub> | 0.86  | 0.76  | 0.84             | 0.29              |
| CeNiO <sub>3</sub> | 0.56  | 0.90  | 1.00             | 0.06              |
| PrNiO <sub>3</sub> | 0.77  | 0.76  | 0.05             | 0.08              |
| NdNiO <sub>3</sub> | 1.00  | 1.00  | 0.00             | 0.05              |
| SmNiO <sub>3</sub> | 0.00  | 0.00  | 0.71             | 0.00              |
| EuNiO <sub>3</sub> | 0.86  | 0.76  | 0.23             | 1.00              |

**Table S18** Univariate linear regression results of OER/ORR activity and key descriptors of alkaline earth system

| Activity type | Descriptor name         | Fitting equation                                                | Coefficient of determination | P value |
|---------------|-------------------------|-----------------------------------------------------------------|------------------------------|---------|
| OER           | $e_g$                   | $\eta_{\text{OER}} = 1.33^* (e_g) + 0.33$                       | 0.88                         | 0.22    |
| OER           | A-site ion radius       | $\eta_{\text{OER}} = -1.40^* (\text{A-site ion radius}) + 1.95$ | 0.99                         | 0.03    |
| ORR           | $\Delta E_{\text{d-p}}$ | $\eta_{\text{ORR}} = -0.29^* (\Delta E_{\text{d-p}}) + 1.02$    | 0.91                         | 0.19    |
| ORR           | d-band center           | $\eta_{\text{ORR}} = -0.29^* (\text{d-band center}) + 1.01$     | 0.90                         | 0.20    |

**Table S19** Multiple linear regression results of OER activity and key descriptors of rare earth system

| Descriptor name         | Denormalization coefficient ( $\eta : V$ ; descriptor: normalized value) | Standardization coefficient (beta, weight) | P value | Correlation direction |
|-------------------------|--------------------------------------------------------------------------|--------------------------------------------|---------|-----------------------|
| ICOHP                   | 0.61                                                                     | 0.76                                       | 0.70    | positive correlation  |
| $e_g$                   | -0.26                                                                    | -0.32                                      | 0.84    | negative correlation  |
| $\Delta E_{\text{d-p}}$ | 0.05                                                                     | 0.07                                       | 0.91    | positive correlation  |
| A-site ion radius       | -0.74                                                                    | -0.98                                      | 0.32    | negative correlation  |

Note: the regression is based on the normalized DFT data of six rare earth systems; Overall model indicators: multiple  $R=0.8824$ ,  $R^2=0.7786$ , significance  $F=0.6537$  (due to the limited number of data points, focus on the weight trend of standardization coefficient); The greater the absolute value of the standardization coefficient (beta), the higher the weight of the descriptor on OER activity.

**Table S20** Multiple linear regression results of ORR activity and key descriptors of rare earth system

| Descriptor name   | Denormalization coefficient ( $\eta$ : V; descriptor: normalized value) | Standardization coefficient (beta, weight) | P value | Correlation direction |
|-------------------|-------------------------------------------------------------------------|--------------------------------------------|---------|-----------------------|
| ICOHP             | -1.83                                                                   | -1.37                                      | 0.23    | negative correlation  |
| $e_g$             | 2.22                                                                    | 1.64                                       | 0.17    | positive correlation  |
| $\Delta E_{d-p}$  | 0.34                                                                    | 0.31                                       | 0.39    | positive correlation  |
| A-site ion radius | -0.29                                                                   | -0.23                                      | 0.45    | negative correlation  |

Note: the regression is based on the normalized DFT data of six rare earth systems; Overall model indicators: multiple  $R=0.9859$ ,  $R^2=0.9720$ , significance  $F=0.2486$  (due to the limited number of data points, focus on the weight trend of standardization coefficient); The greater the absolute value of the standardization coefficient (beta), the higher the weight of the descriptor on ORR activity.

## References

- [1] J.M. Munro, K. Latimer, M.K. Horton, et al., An improved symmetry-based approach to reciprocal space path selection in band structure calculations, *npj Comput. Mater.* 6(1) (2020).
- [2] S. Somdee, M. Rittirum, T. Saelee, et al., First-principles investigations on effects of B-site substitution (B=Mn, Fe, and Co) on La-based perovskite oxides as bifunctional electrocatalysts for rechargeable metal–air batteries, *Advanced Theory and Simulations* 7(6) (2024) 2301235.
- [3] X. Wang, M. Li, Z. Wu, In situ spectroscopic insights into the redox and acid-base properties of ceria catalysts, *Chinese Journal of Catalysis* 42(12) (2021) 2122-2140.
- [4] M.B. Kanoun, A.H. Reshak, N. Kanoun-Bouayed, et al., Evidence of Coulomb correction and spin–orbit coupling in rare-earth dioxides CeO<sub>2</sub>, PrO<sub>2</sub> and TbO<sub>2</sub>: An ab initio study, *J. Magn. Magn. Mater.* 324(7) (2012) 1397-1405.
- [5] Q. Wu, G. Liu, H. Shi, et al., Impact of Nd doping on electronic, optical, and magnetic properties of ZnO: A GGA + U study, *Molecules*, 2023, p. 7416.
- [6] J. Feng, B. Xiao, C.L. Wan, et al., Electronic structure, mechanical properties and thermal conductivity of Ln<sub>2</sub>Zr<sub>2</sub>O<sub>7</sub> (Ln=La, Pr, Nd, Sm, Eu and Gd) pyrochlore, *Acta Mater.* 59(4) (2011) 1742-1760.
- [7] Z.-Y. Zhao, W.-W. Dai, Structural, electronic, and optical properties of Eu-doped BiO<sub>X</sub> (X = F, Cl, Br, I): A DFT+U Study, *Inorg. Chem.* 53(24) (2014) 13001-13011.
- [8] Z. Wu, M. Fan, H. Jiang, et al., Harnessing the Unconventional Cubic Phase in 2D LaNiO<sub>3</sub> Perovskite for Highly Efficient Urea Oxidation, *Angew. Chem. Int. Ed.* 64(1) (2025) e202413932.
- [9] L. Wang, K.A. Stoerzinger, L. Chang, et al., Tuning bifunctional oxygen electrocatalysts by changing the A-site rare-earth element in perovskite nickelates, *Adv. Funct. Mater.* 28(39) (2018) 1803712.
